# Supplementary material for: Estimation of donor-derived cell-free DNA ratio by SNP capture hybridization and clustering of NGS data
Source: Research Square preprint supplement (doi:10.21203/rs.3.rs-6779902/v1), 2025-06-12
Supplement: Supplementary file 1 [file 936a588a471175e872b7d747.xlsx]

## Sheet: Supplementary Table
		Supplementary Table
		Days afte Tx		unrelated donor				sibling				parent to child
				direct method	clustering 1*1	clustering 2*2		direct method	clustering 1	clustering 2		direct method	clustering 1	clustering 2
		0		0	0	0.00920379		0	0	0.00567468		0	0	0.00545561
		1		0.273729	0.30648	0.063838		0.279009	0.263393	0.0268325		0.16964	0.17122	0.0688421
		3		0.056539	0.0563263	0.0600712		0.0880356	0.0898439	0.078064		0.355473	0.351147	0.00319569
		5		0.0151966	0.026549	0.0245606		0.0310815	0.0462001	0.0362794		0.121446	0.122155	0.056161
		7		0.0156786	0.0203936	0.0178373		0.022121	0.023002	0.0231683		0.12017	0.131048	0.0597615
		14		0.00472356	0.0167841	0.0106087		0.0106625	0.0214196	0.0156211		0.00850879	0.0350652	0.0169829
		28		0.00449856	0.0158074	0.0116125		0.0116818	0.0275729	0.0211246		-0.00655831	0.0414999	0.0306959
		ccc*3			0.9887	0.9316*4			0.9923	0.9675*4			0.9831	-*4
		*1 clustering with pre-transplantation SNP data
		*2 clustering without pre-transplantation SNP data
		*3 concordance correlation coefficients between direct method results
		*4 For estimations without pre-transplant SNP data, values ≥10% were excluded due to reduced accuracy. In parent-to-child transplants, most values exceeded this threshold; therefore, CCC was not calculated.
